# Supplementary material
Source: publisher figshare collection journal article supplement (https://rs.figshare.com/ndownloader/files/13817093)

***Anaplasma* spp.**

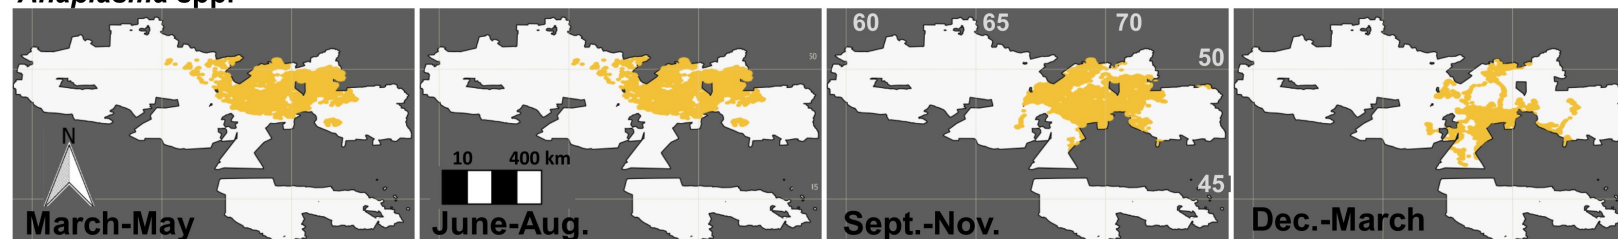

***Bacillus anthracis***

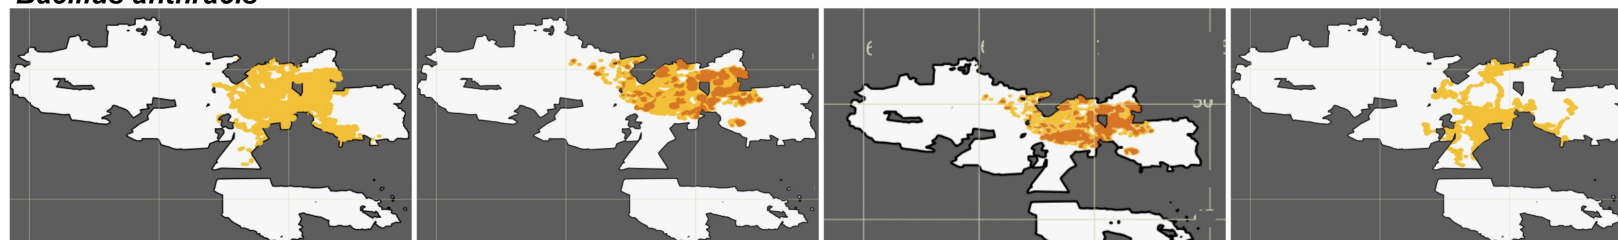

***Mycobacterium bovis***

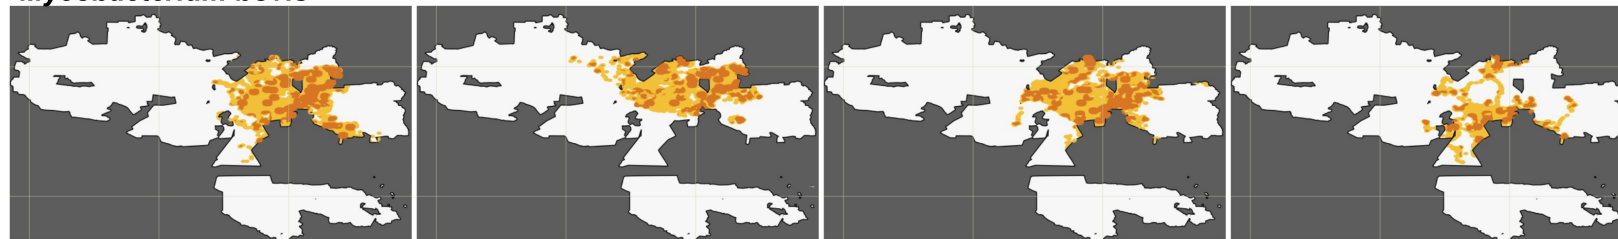

***Brucella* spp.**

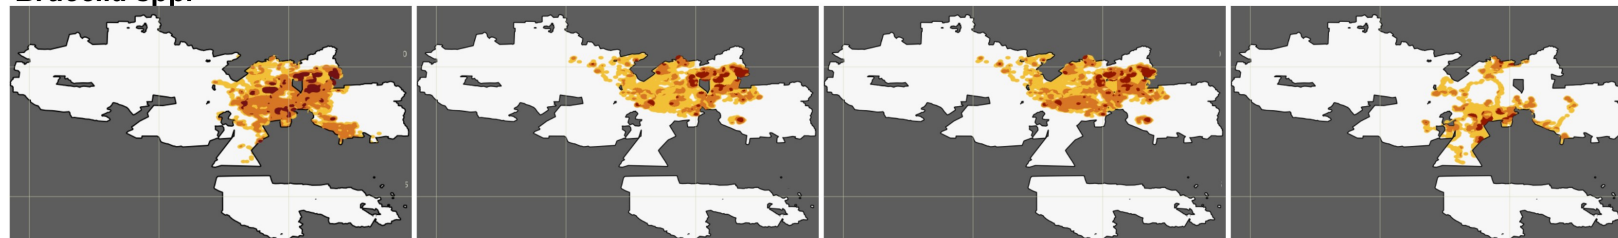

**Likelihood of pathogen transmission from livestock to saiga**

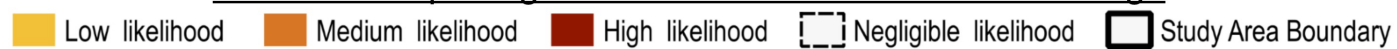

***Chlamydophila* spp.**

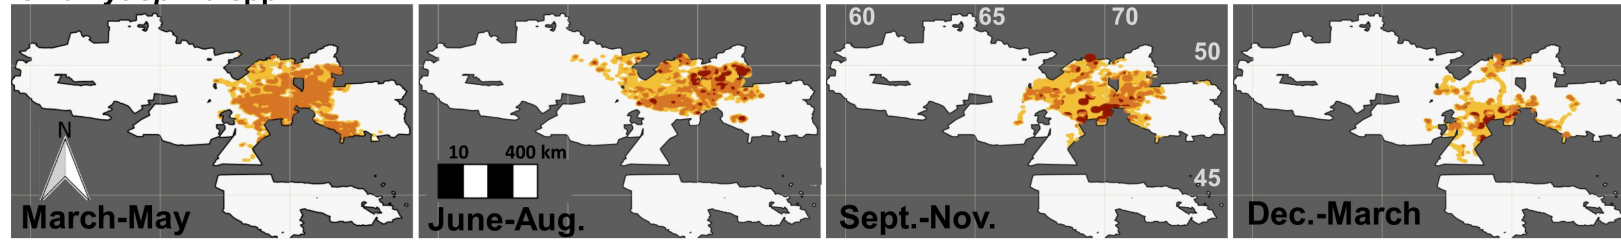

***Clostridium piliforme***

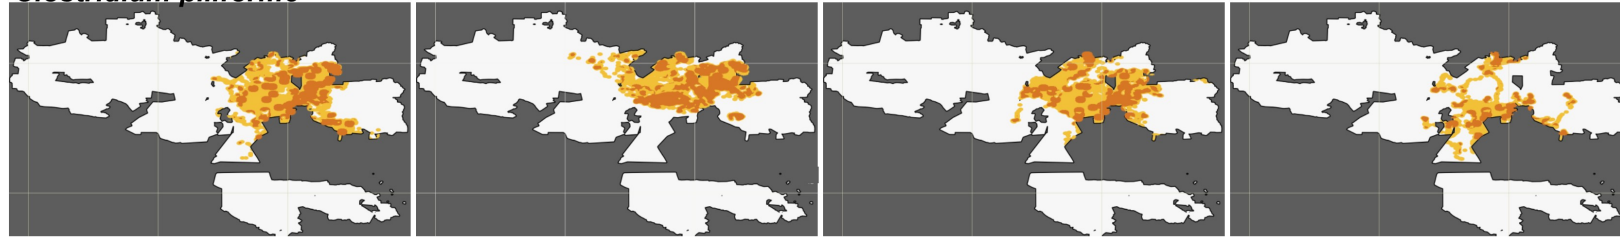

***Leptospira interrogans***

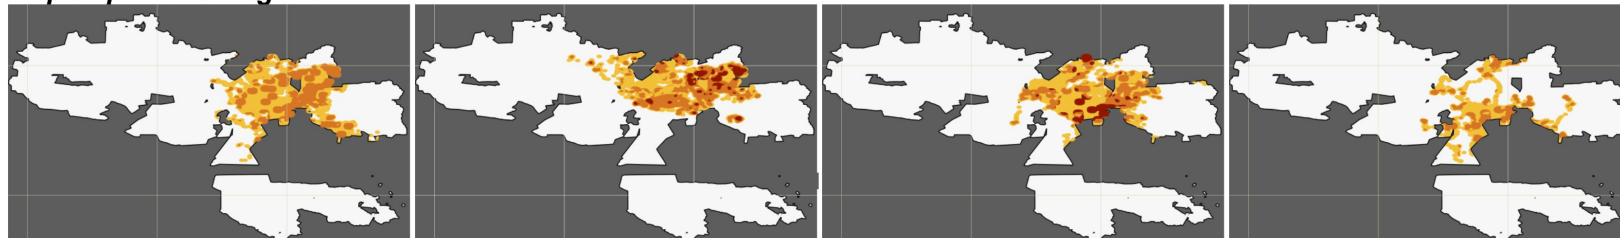

***Pasteurella* spp.**

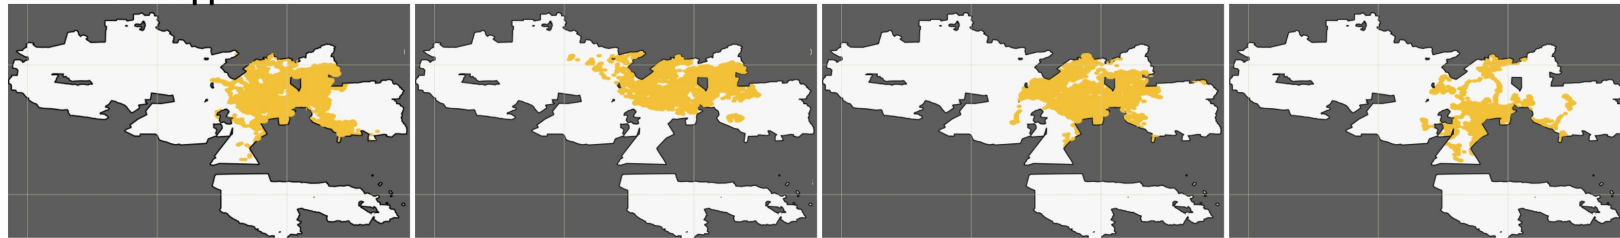

Likelihood of pathogen transmission from livestock to saiga

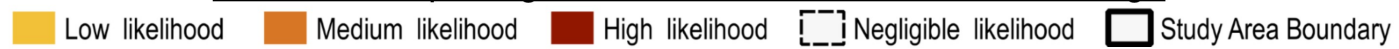

***Listeria monocytogenes***

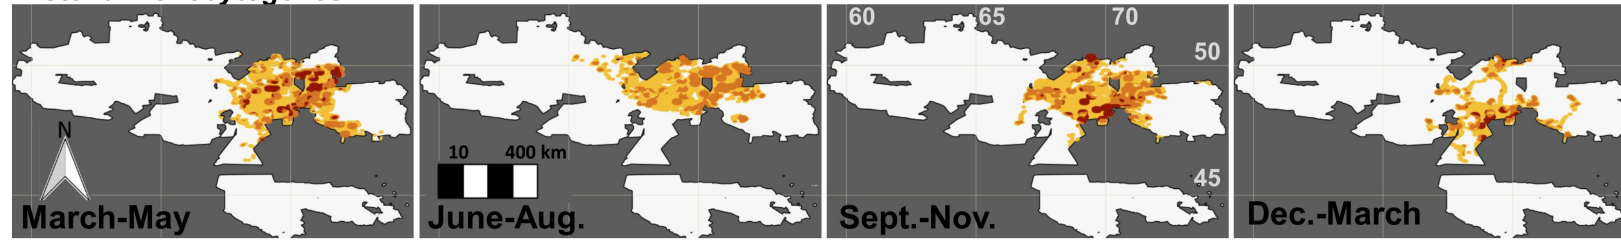

***Mycobacterium avium* subsp. *paratuberculosis***

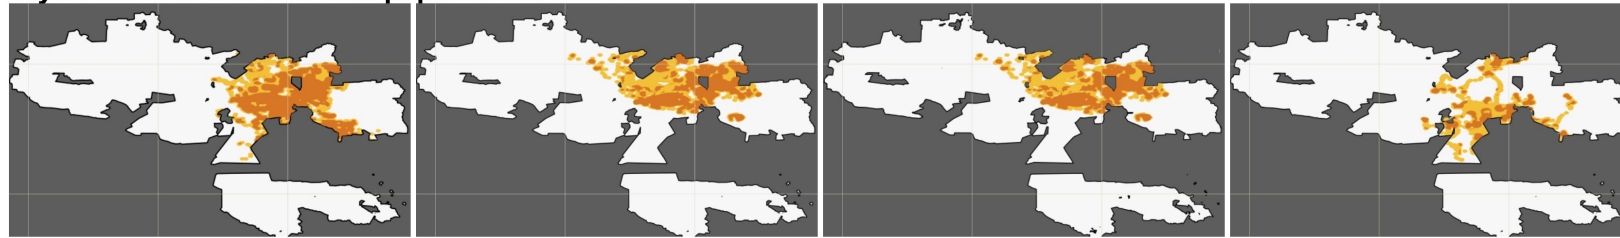

***Mycoplasma capricolum capripneumoniae***

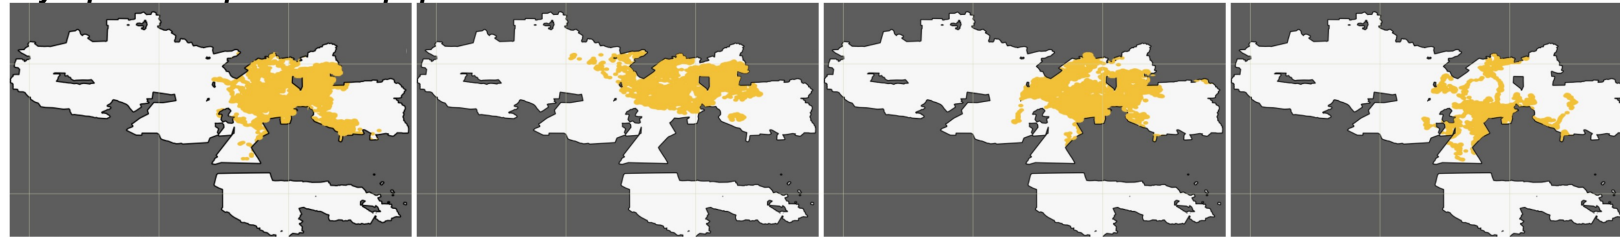

***Salmonella enterica***

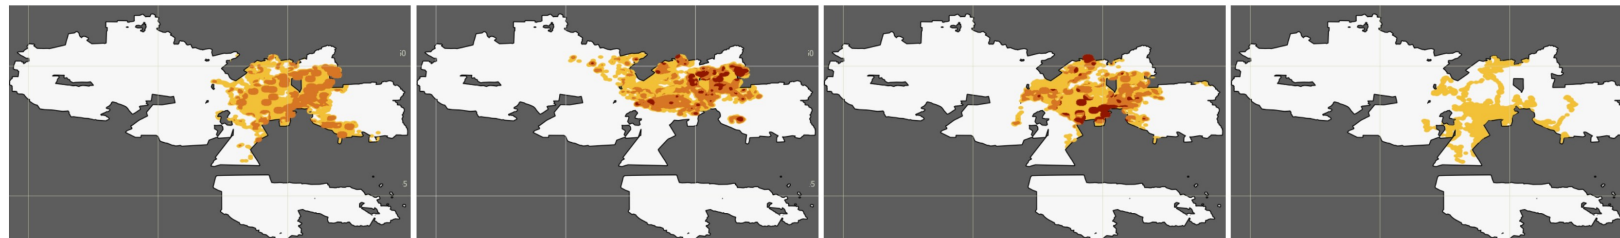

Likelihood of pathogen transmission from livestock to saiga



***Babesia* spp.**

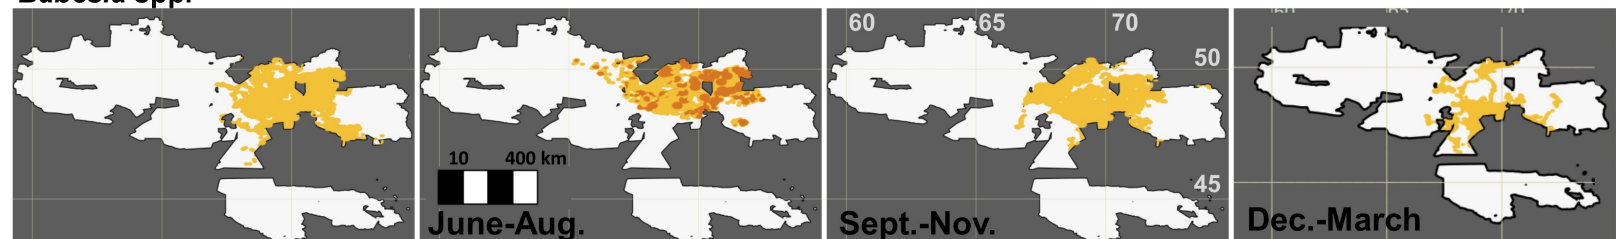

***Theileria ovis***

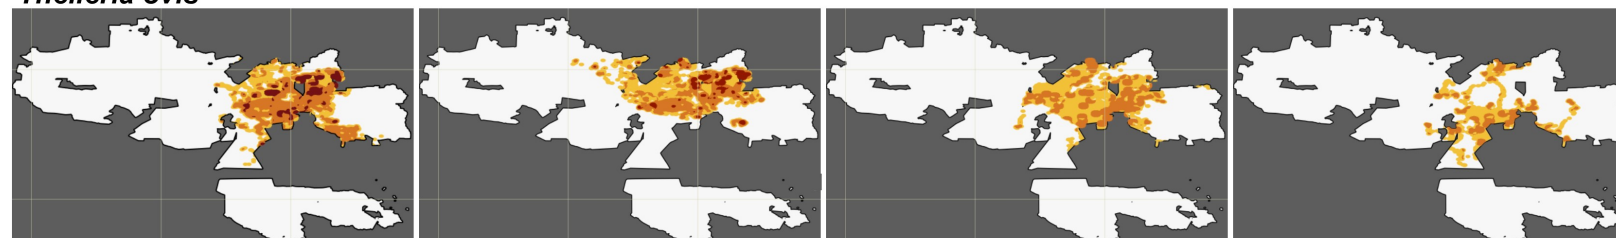

***Sarcoptes scabiei***

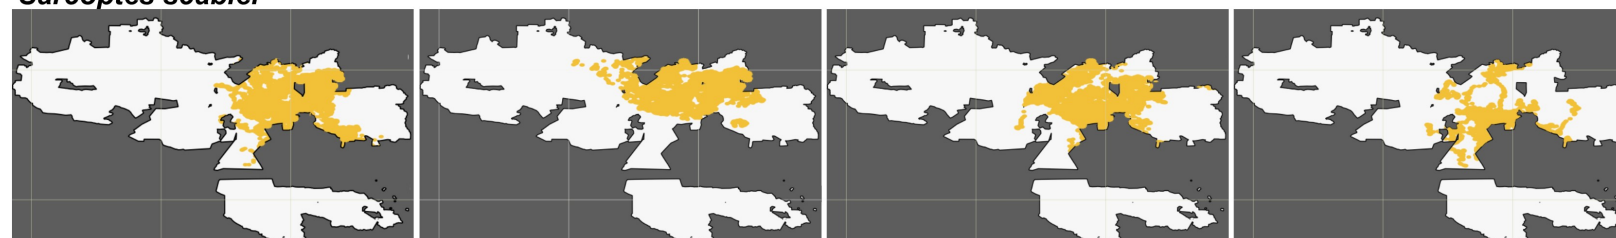

***Psoroptes* spp.**

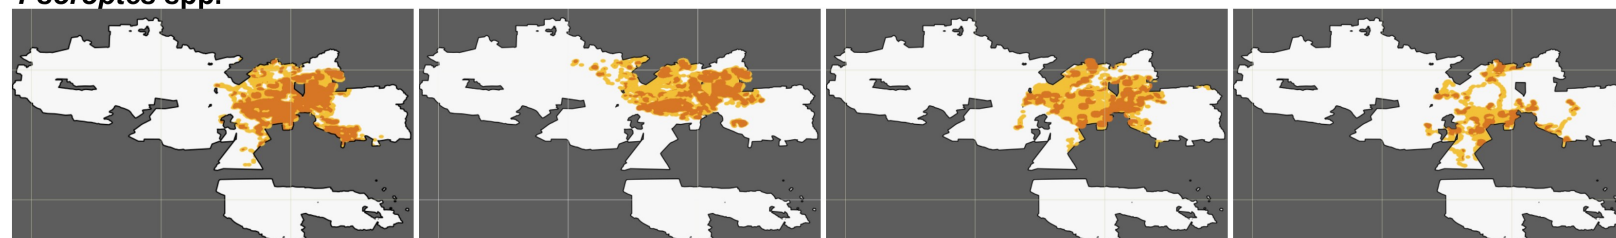

Likelihood of pathogen transmission from livestock to saiga

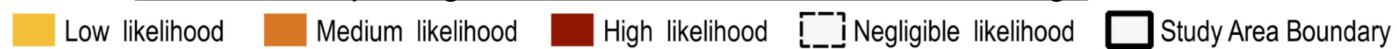



***Trichinella* spp.**

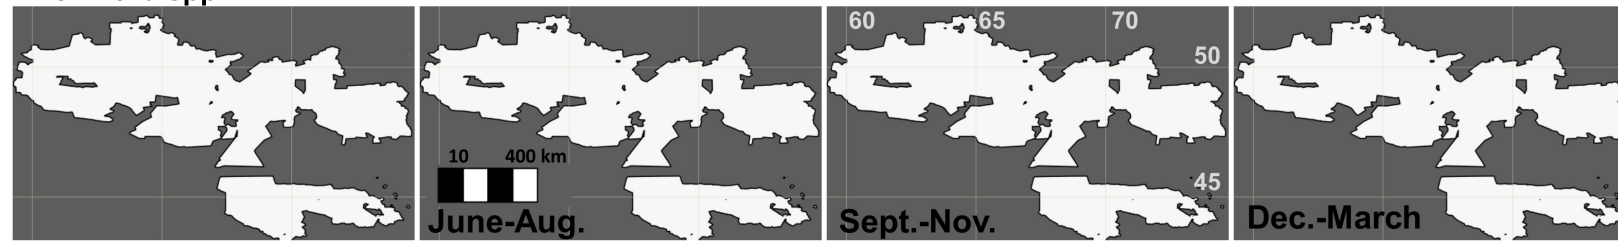

***Echinococcus granulosus***

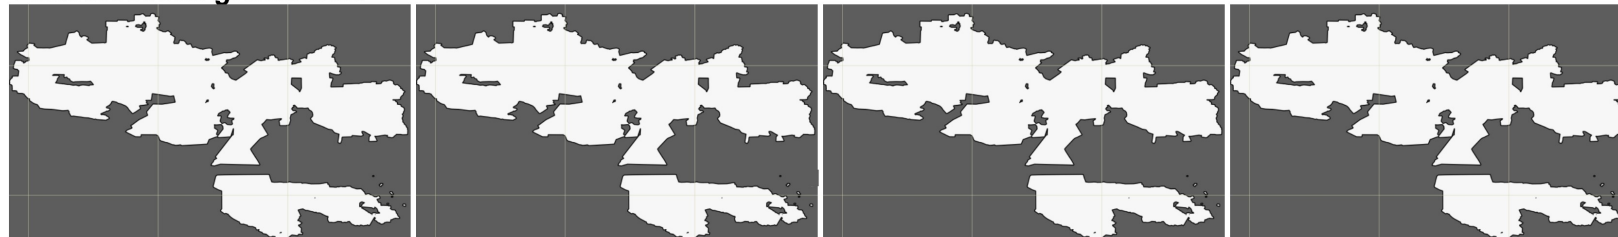

***Fasciola* spp.**

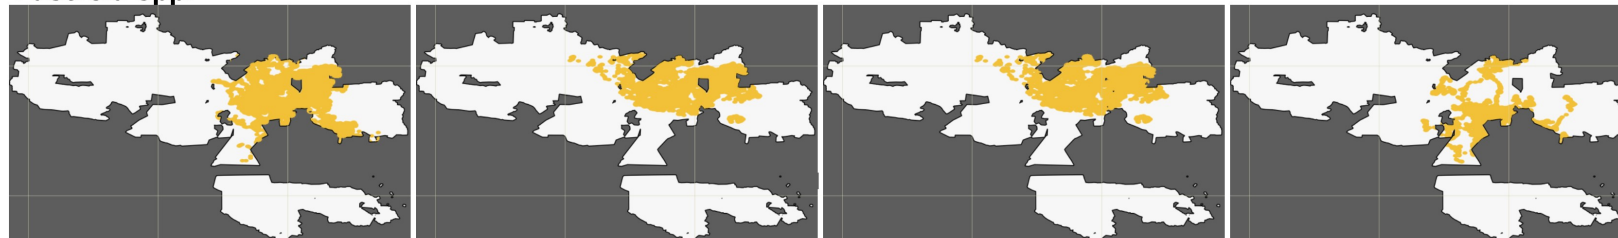

**Helminths**

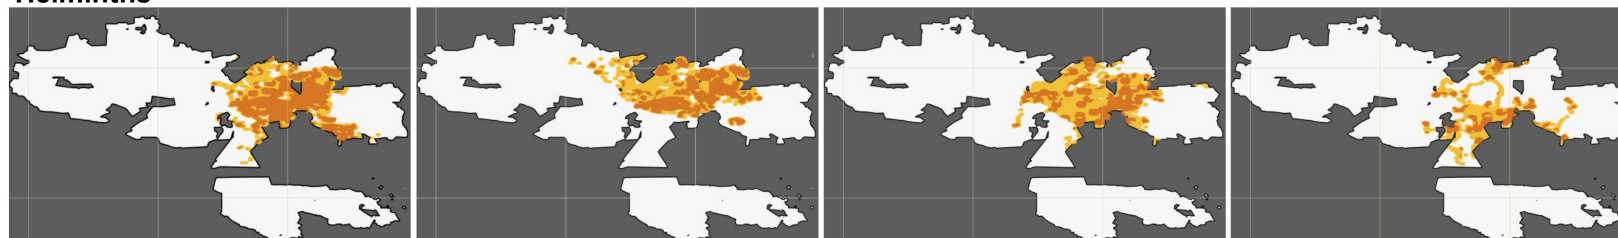

Likelihood of pathogen transmission from livestock to saiga

Low likelihood Medium likelihood High likelihood Negligible likelihood Study Area Boundary

### Nematodes

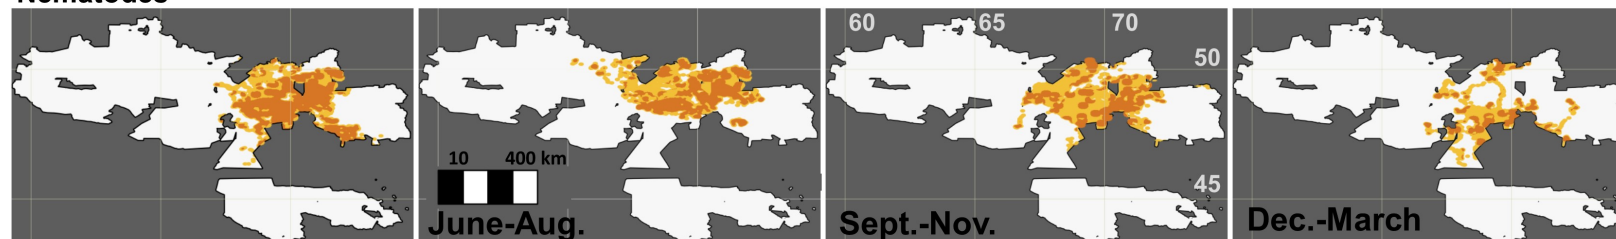

### Alcelaphine Herpes virus 1 & Ovine herpes virus 2

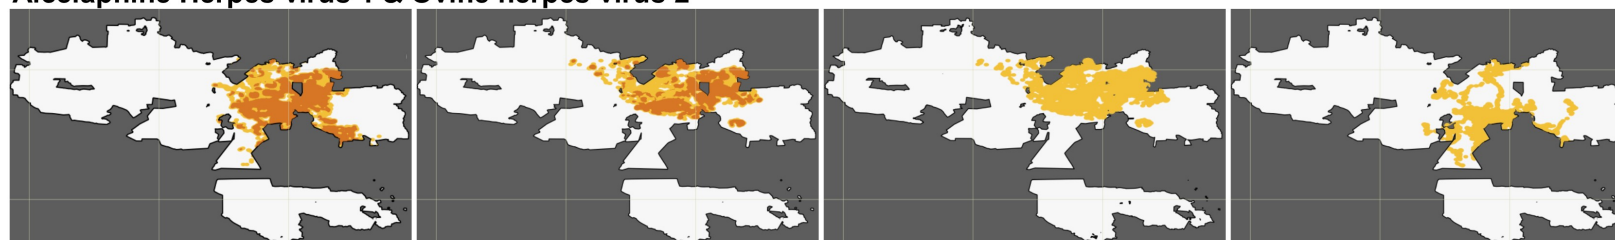

### Aujesky's disease virus

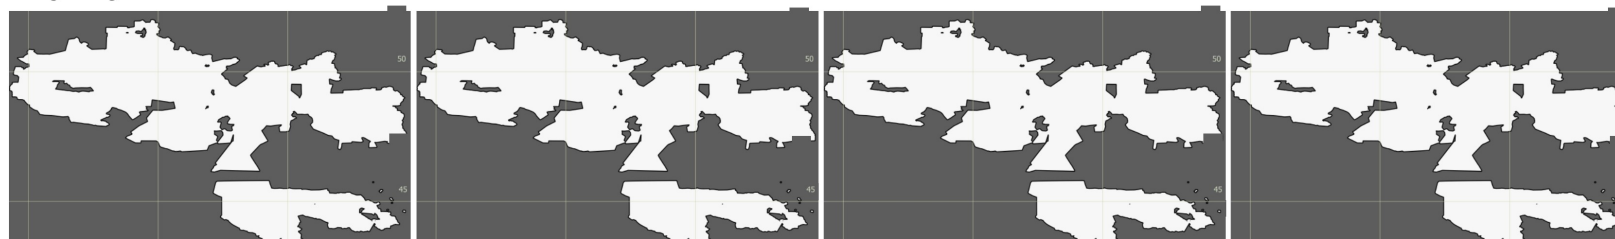

### Likelihood of pathogen transmission from livestock to saiga

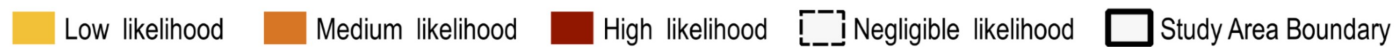

### Bovine herpes virus 1

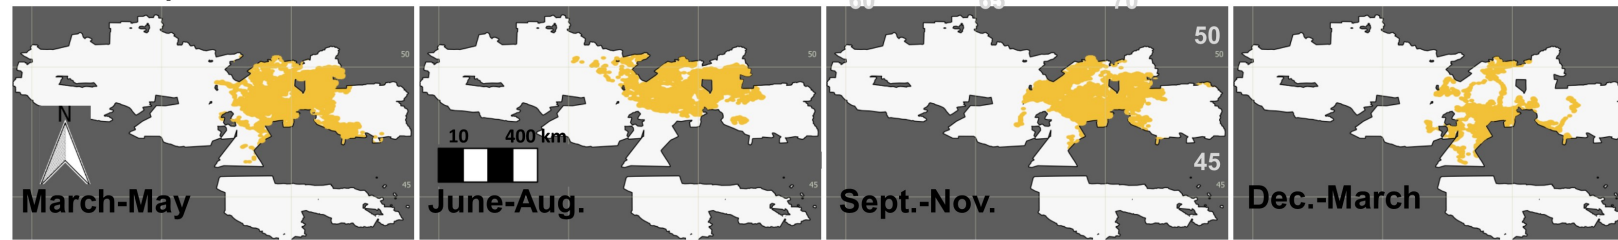

### Bovine viral diarrhoea virus

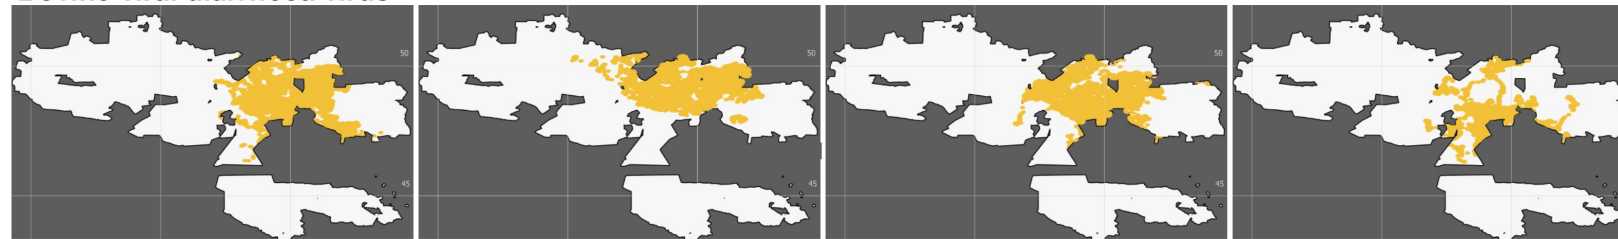

### Bluetongue virus

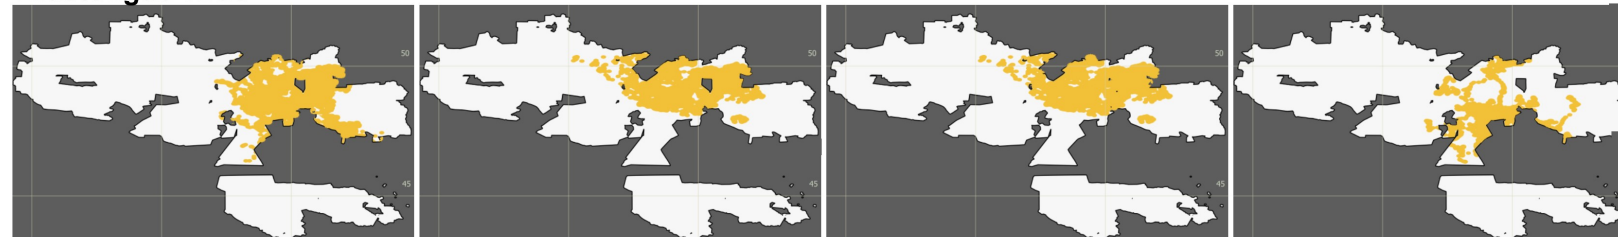

### Crimean-Congo haemorrhagic fever virus

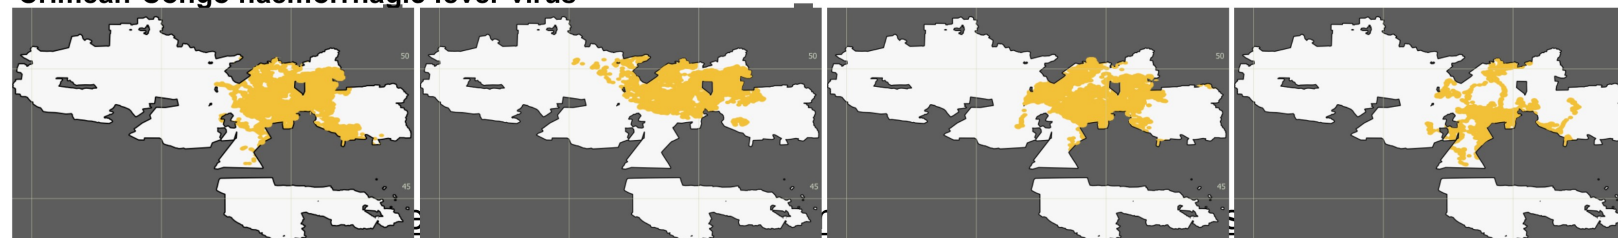

Low likelihood
  Medium likelihood
  High likelihood
  Negligible likelihood
  Study Area Boundary

### Epizootic haemorrhagic disease virus

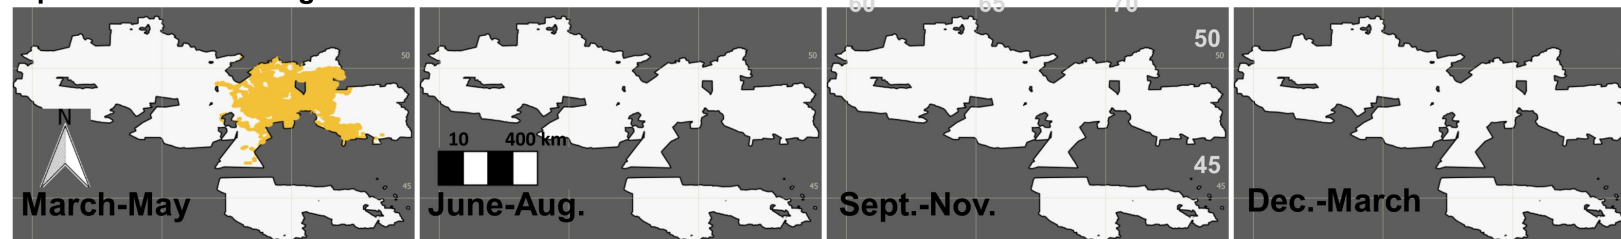

### Foot and mouth disease virus

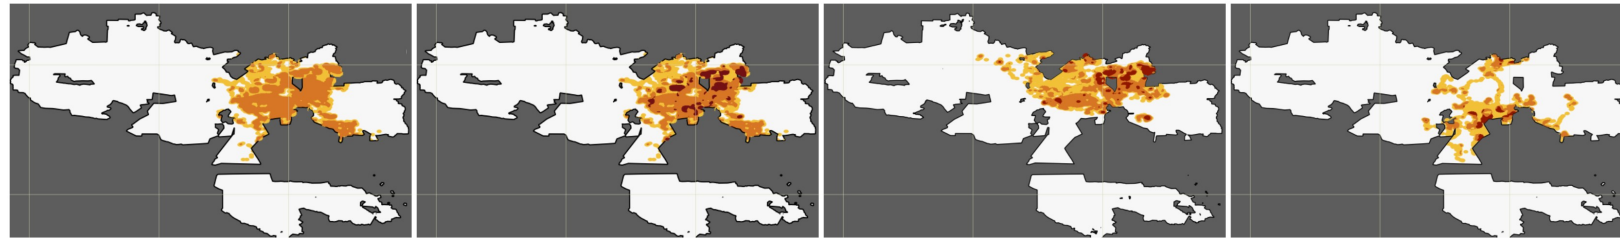

### Low pathogenic avian influenza virus

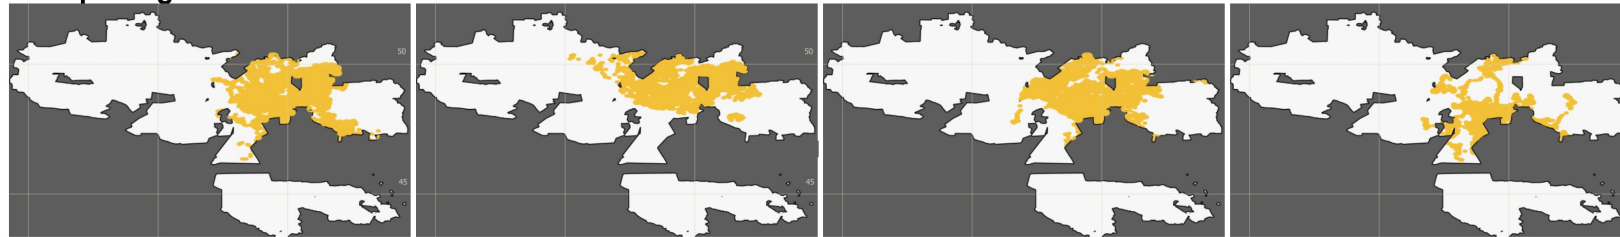

### Lumpy skin disease virus

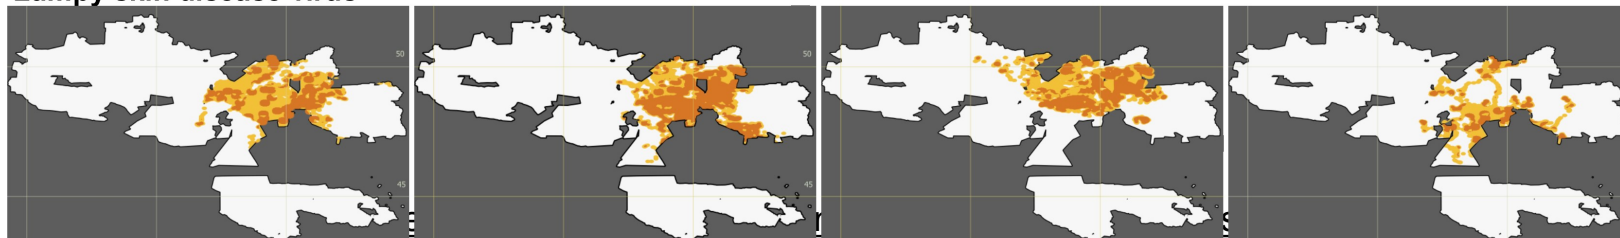

Low likelihood
  Medium likelihood
  High likelihood
  Negligible likelihood
  Study Area Boundary



### Peste des petits ruminants virus

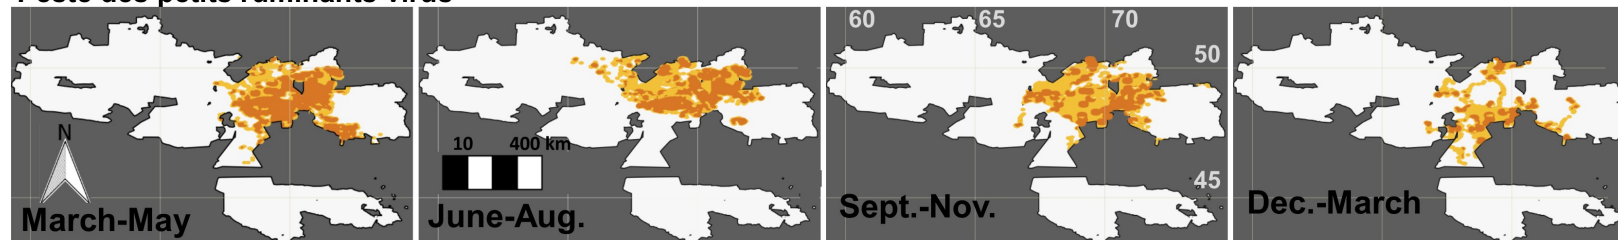

### Sheep pox & Goat pox viruses

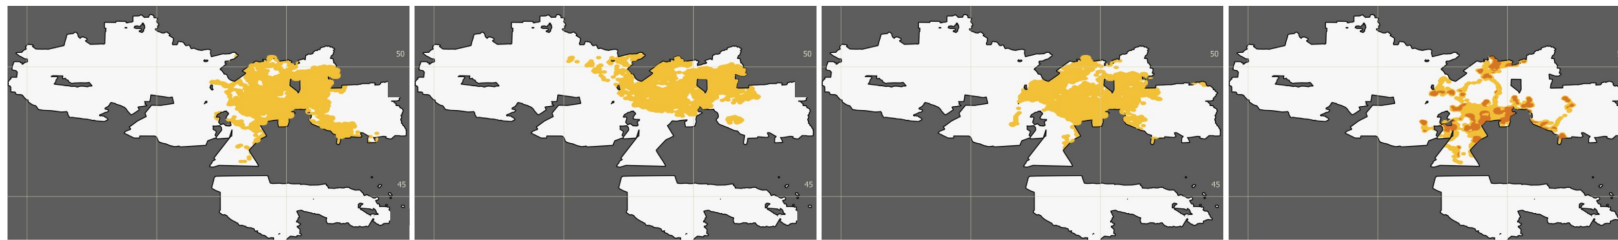

### Tick-borne encephalitis virus

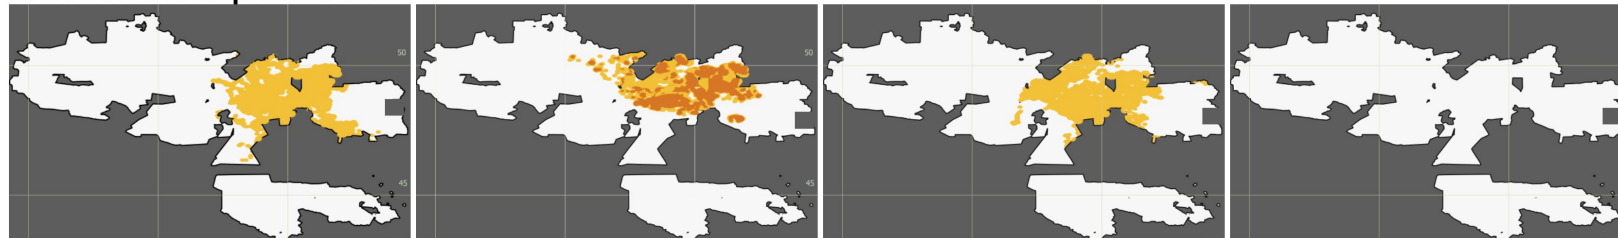

### Likelihood of pathogen transmission from livestock to saiga

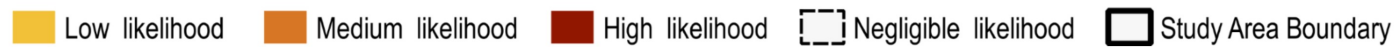

Supplement: Supplementary file [file 13817093]
